# Supplementary material for: A Nonsense Variant in CCDC65 Gene Causes Respiratory Failure Associated with Increased Lamb Mortality in French Lacaune Dairy Sheep
Source: MDPI journal article supplement (doi:10.3390/genes13010045), 2021-12-24
Supplement: s1 [file s1]

## Supplementary Materials

**Table S1.** Accession numbers of the 88 whole-genome sequences used in the analysis

| Breed                        | Number of animals | ENA run accession                                                                                                                                                                                                                                                                                               | EBI project accession       | Associated references |
|------------------------------|-------------------|-----------------------------------------------------------------------------------------------------------------------------------------------------------------------------------------------------------------------------------------------------------------------------------------------------------------|-----------------------------|-----------------------|
| Dairy Lacaune                | 24                | ERR3276357; ERR3276358; ERR3276359; ERR3276360; ERR3276361; ERR3276362; ERR3276363; ERR3276364; ERR3276365; ERR3276368; ERR3276369; ERR3276370; ERR3276371; ERR3276372; <b>ERR3276373*</b> ; ERR3276374; ERR3276375; <b>ERR3276376*</b> ; ERR3276377; ERR3276378; ERR3276379<br>ERR968423; ERR968424; ERR968425 | PRJEB32110<br><br>PRJEB9911 | <br><br>[1]           |
| Manech Tête Rousse           | 20                | ERR3712282; ERR3712283; ERR3712284; ERR3712285; ERR3712286; ERR3712287; ERR3712288; ERR3712289; ERR3712290; ERR3712291; ERR3712292; ERR3712293; ERR3712294; ERR3712295; ERR3712296; ERR3712297; ERR3712298; ERR3712299; ERR3712300; ERR3712301                                                                  | PRJEB35682                  |                       |
| Romane x Martinik Blackbelly | 13                | ERR3255915; ERR3255916; ERR3255917; ERR3255918; ERR3255919; ERR3988554; ERR3988555; ERR3988556; ERR3988557; ERR3988558; ERR3988559; ERR3988560; ERR3988561                                                                                                                                                      | PRJEB31930                  |                       |
| Cambridge                    | 7                 | ERR1419201; ERR1419202; ERR1419203; ERR1419204; ERR1419205; ERR1419206; ERR1419207                                                                                                                                                                                                                              | PRJEB14098                  |                       |
| Vendéen                      | 5                 | ERR4236129; ERR4236130; ERR4236131<br>SRR14934353; SRR14934354                                                                                                                                                                                                                                                  | PRJEB37460<br>PRJNA698548   | [2]                   |
| Romane                       | 4                 | ERS1205902; ERS1205903; ERR2818429; ERR2818430                                                                                                                                                                                                                                                                  | PRJEB14418                  | [3]                   |
| Berrichon du Cher            | 3                 | ERS1205899; ERS1205900; ERS1205901                                                                                                                                                                                                                                                                              | PRJEB14418                  | [3]                   |
| Noire du velay               | 2                 | ERR3828659; ERR3828660                                                                                                                                                                                                                                                                                          | PRJEB35553                  | [4]                   |
| Belclare                     | 2                 | SRR14934360; SRR14935129                                                                                                                                                                                                                                                                                        | PRJNA698548                 |                       |
| Romanov                      | 2                 | ERS1205904; ERS1205905                                                                                                                                                                                                                                                                                          | PRJEB14418                  | [3]                   |
| Suffolk                      | 2                 | SRR14934357; SRR14934358                                                                                                                                                                                                                                                                                        | PRJNA698548                 |                       |
| Texel                        | 2                 | SRR14934355; SRR14934356                                                                                                                                                                                                                                                                                        | PRJNA698548                 |                       |
| Martinik Blackbelly          | 1                 | ERR3255914                                                                                                                                                                                                                                                                                                      | PRJEB31930                  |                       |
| Charollais                   | 1                 | SRR14934359                                                                                                                                                                                                                                                                                                     | PRJNA698548                 |                       |
| <b>Total</b>                 | <b>88</b>         |                                                                                                                                                                                                                                                                                                                 |                             |                       |

\* LDHH6 heterozygous carrier

1. Rupp, R.; Senin, P.; Sarry, J.; Allain, C.; Tasca, C.; Ligat, L.; Portes, D.; Woloszyn, F.; Bouchez, O.; Tabouret, G.; et al. A Point Mutation in Suppressor of Cytokine Signalling 2 (Socs2) Increases the Susceptibility to Inflammation of the Mammary Gland While Associated with Higher Body Weight and Size and Higher Milk Production in a Sheep Model. *PLoS Genet* **2015**, *11*, e1005629, doi:10.1371/journal.pgen.1005629.
2. Fabre, S.; Chantepie, L.; Plisson-Petit, F.; Sarry, J.; Woloszyn, F.; Genet, C.; Drouilhet, L.; Tosser-Klopp, G. A Novel Homozygous Nonsense Mutation in ITGB4 Gene Causes Epidermolysis Bullosa in Mouton Vendéen Sheep. *Animal Genetics* **2020**, doi:https://doi.org/10.1111/age.13026.
3. Demars, J.; Cano, M.; Drouilhet, L.; Plisson-Petit, F.; Bardou, P.; Fabre, S.; Servin, B.; Sarry, J.; Woloszyn, F.; Mulsant, P.; et al. Genome-Wide Identification of the Mutation Underlying Fleece Variation and Discriminating Ancestral Hairy Species from Modern Woolly Sheep. *Molecular Biology and Evolution* **2017**, *34*, 1722–1729, doi:10.1093/molbev/msx114.
4. Chantepie, L.; Bodin, L.; Sarry, J.; Woloszyn, F.; Plisson-Petit, F.; Ruesche, J.; Drouilhet, L.; Fabre, S. Genome-Wide Identification of a Regulatory Mutation in BMP15 Controlling Prolificacy in Sheep. *Front. Genet.* **2020**, *11*, doi:10.3389/fgene.2020.00585.

**Table S2.** Semen parameters of dairy Lacaune rams from artificial insemination center.

| Semen parameters*                               | LDHH6 non-carriers (+/+) | LDHH6 heterozygous carriers (m/+) |
|-------------------------------------------------|--------------------------|-----------------------------------|
| Volume (lsmean, mL)                             | 1.77                     | 1.67                              |
| Concentration (lsmean, x10 <sup>6</sup> spz/mL) | 4.23                     | 4.25                              |
| Motility (lsmean, score 0-5)                    | 4.09                     | 4.03                              |
| Proportion of collected semen used              | 0.80                     | 0.76                              |

\*Data comprised 148,799 records during the 2010-2018 period. No significant genotype effect on semen parameters evaluated by linear model using the GLM procedure in the SAS software (version 9.4; SAS Institute Inc., Cary, NC) considering age at collection, season\*year, moment of day collection (AM, PM), collection interval and LDHH6 status as fixed effects.

p.Glu111

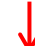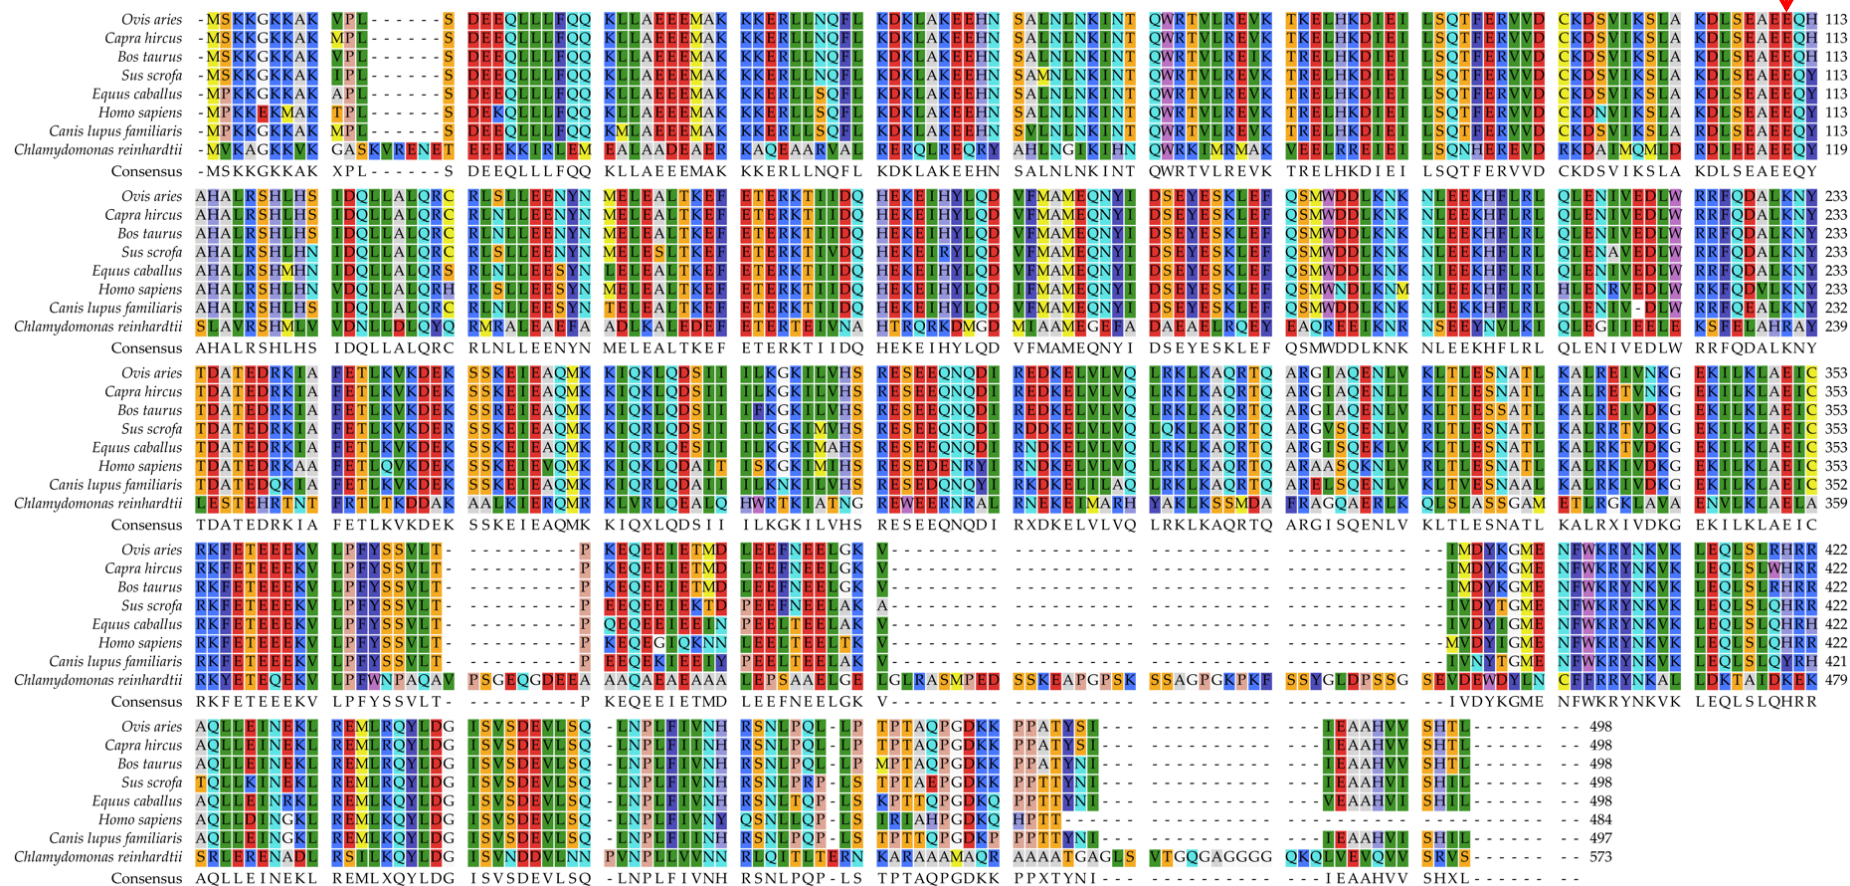

**Figure S1.** CCDC65 protein multiple sequence alignment.

Alignment of mammals (*Ovis aries* XP\_004006438, *Capra hircus* XP\_005680069, *Bos taurus* NP\_001033255, *Sus scrofa* XP\_020947250, *Equus caballus* XP\_001504180, *Homo sapiens* NP\_149115, *Canis lupus familiaris* XP\_038294234) and green alga (*Chlamydomonas reinhardtii* DRC2\_CHLRE) sequences was performed using MUSCLE algorithm in CLC Main Workbench 7.9.1 (Qiagen). All CCDC65 protein sequences are available at NCBI (<https://www.ncbi.nlm.nih.gov/>).

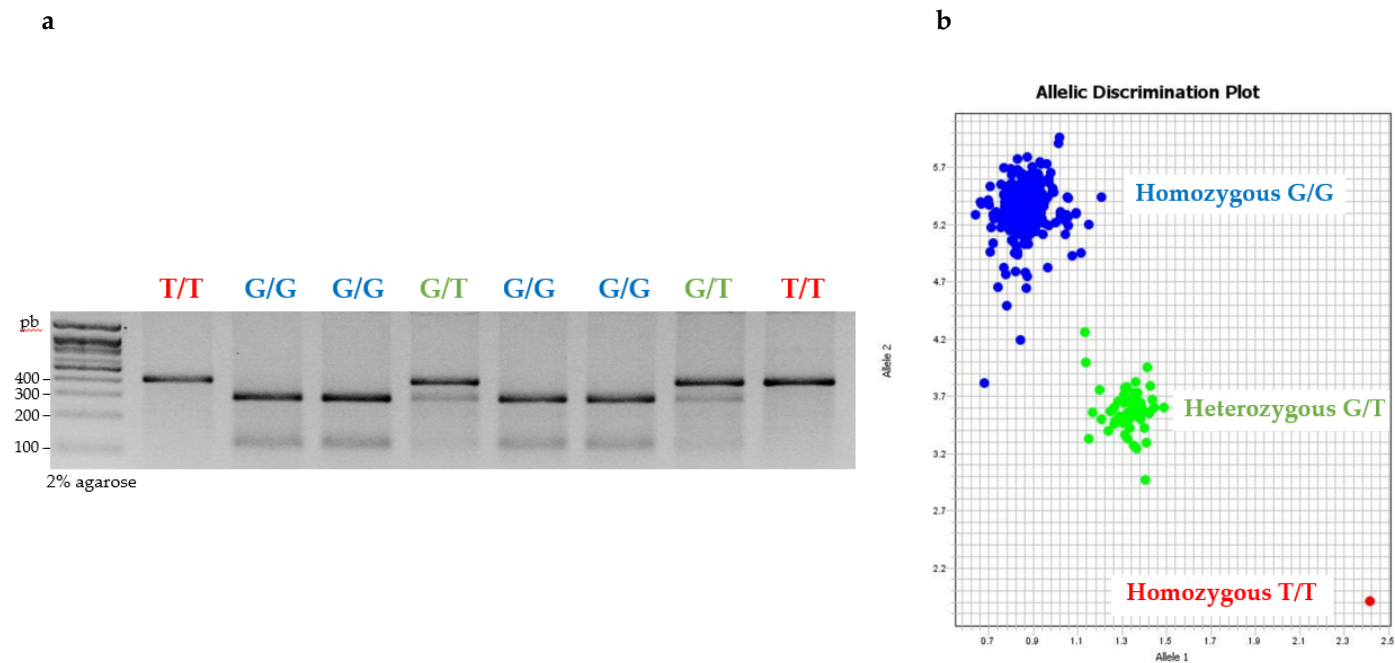

**Figure S2.** Representative genotyping results for c.521G>T variant in *CCDC65*.

(a) RFLP profiles after BsaJI digestion; and (b) Allelic discrimination plot from PACE analysis for homozygous carrier (T/T), heterozygous carrier (G/T) and non-carrier lambs (G/G) of the T variant allele.

| LDHH6 haplotype<br>(27 markers) |              |                 | SNP1                   | SNP2           | SNP3           | SNP4           | SNP5                     | SNP6           | SNP7           | SNP8           | SNP9                   | SNP10                  | SNP11                  | SNP12                  | SNP13                    | SNP14          | SNP15          | SNP16                  | SNP17          |                  | SNP18          | SNP19          | SNP20                  | SNP21                  | SNP22                  | SNP23                  | SNP24                  | SNP25                  | SNP26                  | SNP27                  |   |  |  |  |  |  |  |  |  |  |  |  |  |  |
|---------------------------------|--------------|-----------------|------------------------|----------------|----------------|----------------|--------------------------|----------------|----------------|----------------|------------------------|------------------------|------------------------|------------------------|--------------------------|----------------|----------------|------------------------|----------------|------------------|----------------|----------------|------------------------|------------------------|------------------------|------------------------|------------------------|------------------------|------------------------|------------------------|---|--|--|--|--|--|--|--|--|--|--|--|--|--|
|                                 |              |                 | G                      | G              | A              | A              | G                        | A              | G              | A              | G                      | A                      | G                      | A                      | C                        | G              | A              | A                      | A              | T                | G              | A              | G                      | A                      | G                      | C                      | A                      | C                      | A                      | C                      | C |  |  |  |  |  |  |  |  |  |  |  |  |  |
| Animal                          | LDDH6 status | CCDC65 genotype | OAR3_145545612.1 (A/G) | s75892.1 (A/G) | s25992.1 (A/C) | s04315.1 (A/G) | OAR3_145755539_X.1 (A/G) | s34624.1 (A/G) | s28071.1 (A/G) | s07094.1 (A/G) | OAR3_145997669.1 (A/G) | OAR3_146029858.1 (A/G) | OAR3_146042298.1 (A/G) | OAR3_146114339.1 (A/G) | OAR3_146168926_X.1 (C/G) | s26071.1 (A/G) | s35014.1 (A/C) | OAR3_146519457.1 (A/G) | s61782.1 (A/G) | CCDC65 SNV (G/T) | s07631.1 (A/G) | s35724.1 (A/G) | OAR3_146693366.1 (A/G) | OAR3_146751517.1 (A/G) | OAR3_146778162.1 (A/G) | OAR3_146824324.1 (A/G) | OAR3_146832060.1 (A/C) | OAR3_147028849.1 (A/C) | OAR3_147128672.1 (A/C) | OAR3_147275963.1 (A/G) |   |  |  |  |  |  |  |  |  |  |  |  |  |  |
| Animal A                        | +/+          | G/T             |                        |                |                |                |                          |                |                |                |                        |                        |                        |                        |                          |                |                |                        |                | T                |                |                |                        |                        |                        |                        |                        |                        |                        |                        |   |  |  |  |  |  |  |  |  |  |  |  |  |  |
| Animal B                        | +/+          | G/T             |                        |                |                |                |                          |                |                |                |                        |                        |                        |                        |                          |                |                |                        |                | T                |                |                |                        |                        |                        |                        |                        |                        |                        |                        |   |  |  |  |  |  |  |  |  |  |  |  |  |  |
| Animal C                        | +/+          | G/T             |                        |                |                |                |                          |                |                |                |                        |                        |                        |                        |                          |                |                |                        |                | T                |                |                |                        |                        |                        |                        |                        |                        |                        |                        |   |  |  |  |  |  |  |  |  |  |  |  |  |  |
| Animal D                        | +/+          | G/T             |                        |                |                |                |                          |                |                |                |                        |                        |                        |                        |                          |                |                |                        |                | T                |                |                |                        |                        |                        |                        |                        |                        |                        |                        |   |  |  |  |  |  |  |  |  |  |  |  |  |  |
| Animal E                        | +/+          | G/T             |                        |                |                |                |                          |                |                |                |                        |                        |                        |                        |                          |                |                |                        |                | T                |                |                |                        |                        |                        |                        |                        |                        |                        |                        |   |  |  |  |  |  |  |  |  |  |  |  |  |  |
| Animal F                        | +/+          | G/T             |                        |                |                |                |                          |                |                |                |                        |                        |                        |                        |                          |                |                |                        |                |                  | T              |                |                        |                        |                        |                        |                        |                        |                        |                        |   |  |  |  |  |  |  |  |  |  |  |  |  |  |
| Animal G                        | +/+          | G/T             |                        |                |                |                |                          |                |                |                |                        |                        |                        |                        |                          |                |                |                        |                | T                |                |                |                        |                        |                        |                        |                        |                        |                        |                        |   |  |  |  |  |  |  |  |  |  |  |  |  |  |
| Animal H                        | +/+          | G/T             |                        |                |                |                |                          |                |                |                |                        |                        |                        |                        |                          |                |                |                        |                |                  | T              |                |                        |                        |                        |                        |                        |                        |                        |                        |   |  |  |  |  |  |  |  |  |  |  |  |  |  |
| Animal I                        | +/+          | G/T             |                        |                |                |                |                          |                |                |                |                        |                        |                        |                        |                          |                |                |                        |                |                  | T              |                |                        |                        |                        |                        |                        |                        |                        |                        |   |  |  |  |  |  |  |  |  |  |  |  |  |  |
| Animal J                        | LDHH6/+      | G/G             |                        |                |                |                |                          |                |                |                |                        |                        |                        |                        |                          |                |                |                        |                |                  | G              |                |                        |                        |                        |                        |                        |                        |                        |                        |   |  |  |  |  |  |  |  |  |  |  |  |  |  |
| Animal K                        | LDHH6/+      | G/G             |                        |                |                |                |                          |                |                |                |                        |                        |                        |                        |                          |                |                |                        |                |                  | G              |                |                        |                        |                        |                        |                        |                        |                        |                        |   |  |  |  |  |  |  |  |  |  |  |  |  |  |
| Animal L                        | LDHH6/+      | G/G             |                        |                |                |                |                          |                |                |                |                        |                        |                        |                        |                          |                |                |                        |                |                  | G              |                |                        |                        |                        |                        |                        |                        |                        |                        |   |  |  |  |  |  |  |  |  |  |  |  |  |  |

**Figure S3.** Haplotypes of the LDHH6 region for 12 animals showing mismatch with the CCDC65 SNV.

LDHH6/+ and +/+ refer to heterozygous and non-carriers of LDHH6, respectively. The grey column represents the localization of the CCDC65 variation (G>T) within the LDHH6 haplotype. For each animal, only the phase supposed to host the CCDC65 T variant allele is represented. The blue color indicates the portion of local haplotype matching with the LDHH6 haplotype.
